# Supplementary material for: Polymer brush growth by oxygen-initiated RAFT polymerization on various substrates
Source: Royal Society of Chemistry journal article supplement (doi:10.1039/d1py01195b), 2021-01-01
Supplement: d1py01195b1.pdf [file d1py01195b1.pdf]

*Supporting Information*

**Polymer brush growth by oxygen-initiated RAFT polymerization on various substrates**

*Min Ki Cho, Hyun Ji Seo, Ji Hoon Lee, Woo Kyung Cho\* and Kyung-sun Son\**

**Table of Contents**

|                                                                                                                                                                        |   |
|------------------------------------------------------------------------------------------------------------------------------------------------------------------------|---|
| Figure S1. Film thicknesses and WCAs for various polymer brushes grown on Si/SiO <sub>2</sub> substrates.....                                                          | 2 |
| Table S1. Atomic composition (%) of bare, DOPA-DDMAT-coated, and the polymer-grafted Ti/TiO <sub>2</sub> substrates.....                                               | 2 |
| Figure S2. Survey XPS spectra of various polymer-grafted Ti/TiO <sub>2</sub> substrates.....                                                                           | 3 |
| Figure S3. FTIR spectra of various polymer-grafted Ti/TiO <sub>2</sub> substrates.....                                                                                 | 4 |
| Experimental procedure for the chemical stability tests.....                                                                                                           | 5 |
| Figure S4. Thickness changes of the PHEMA films on Ti/TiO <sub>2</sub> substrates upon exposure to different pH environments over time.....                            | 5 |
| Figure S5. Thickness changes of the PHEMA films on Ti/TiO <sub>2</sub> substrates after sequential sonication treatment.....                                           | 5 |
| Figure S6. Thickness profile of the PHMEA brushes (prepared with 1.5 M HEMA on Ti/TiO <sub>2</sub> substrates) measured by a contact surface profiler, Alpha-Step..... | 6 |
| Figure S7. (a) XPS and (b) FTIR spectra of PHEMA- <i>b</i> -PSPMA-grafted Ti/TiO <sub>2</sub> substrate.....                                                           | 6 |
| Figure S8. <sup>1</sup> H NMR spectrum of suc-DDMAT in CDCl <sub>3</sub> .....                                                                                         | 7 |
| Figure S9. <sup>1</sup> H NMR spectrum of DOPA-DDMAT in CDCl <sub>3</sub> .....                                                                                        | 7 |
| Sample preparation for GPC analysis (polymer detachment from a substrate).....                                                                                         | 8 |
| Figure S10. GPC chromatogram of PMAA brushes grown and detached from a large Ti/TiO <sub>2</sub> substrate....                                                         | 8 |
| Figure S11. Evolution of polymer brush thickness of (a) PHEMA, (b) PMAA, (c) PMPDSA <sub>H</sub> grown <i>via</i> O <sub>2</sub> -SI-RAFT polymerization.....          | 8 |
| References.....                                                                                                                                                        | 8 |

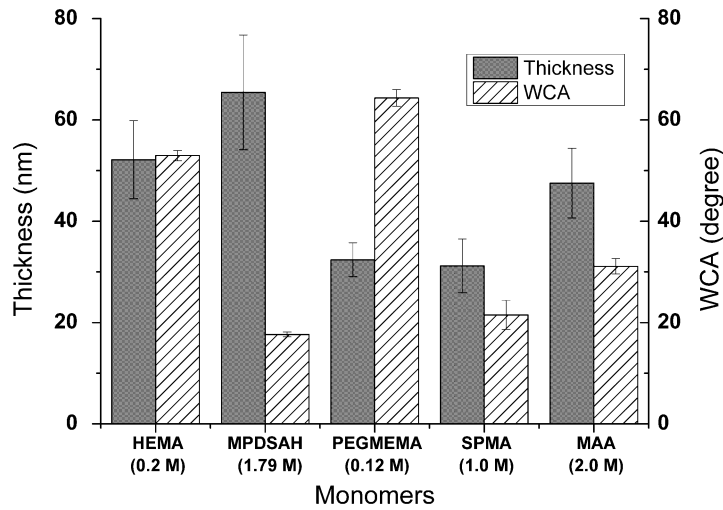

**Figure S1.** Film thicknesses (determined by ellipsometry) and water contact angles for various polymer brushes (4-hour polymerization under diffusion setup conditions) grown on Si/SiO<sub>2</sub> substrates.

**Table S1.** Atomic composition (%) of bare, DOPA-DDMAT-coated, and the polymer-grafted Ti/TiO<sub>2</sub> substrates.

|                          | C 1s  | N 1s  | O 1s  | S 2p | Ti 2p | K 2p |
|--------------------------|-------|-------|-------|------|-------|------|
| Ti/TiO <sub>2</sub> bare | 20.48 | 1.03  | 51.38 | 0.41 | 26.70 | -    |
| DOPA-DDMAT               | 45.86 | 3.65  | 34.50 | 1.99 | 14.00 | -    |
| PHEMA                    | 67.42 | 0.50  | 31.80 | 0.13 | 0.15  | -    |
| PMPDSA                   | 45.02 | 15.92 | 30.41 | 8.36 | 0.29  | -    |
| PPEGMEMA                 | 69.44 | 0.15  | 29.80 | 0.49 | 0.12  | -    |
| PSPMA                    | 61.98 | 0.62  | 25.93 | 5.92 | 0.13  | 5.42 |
| PMAA                     | 72.00 | 0.63  | 26.94 | 0.23 | 0.20  | -    |
| PHEMA- <i>b</i> -PSPMA   | 52.98 | 0.49  | 33.80 | 6.33 | 0.17  | 6.23 |

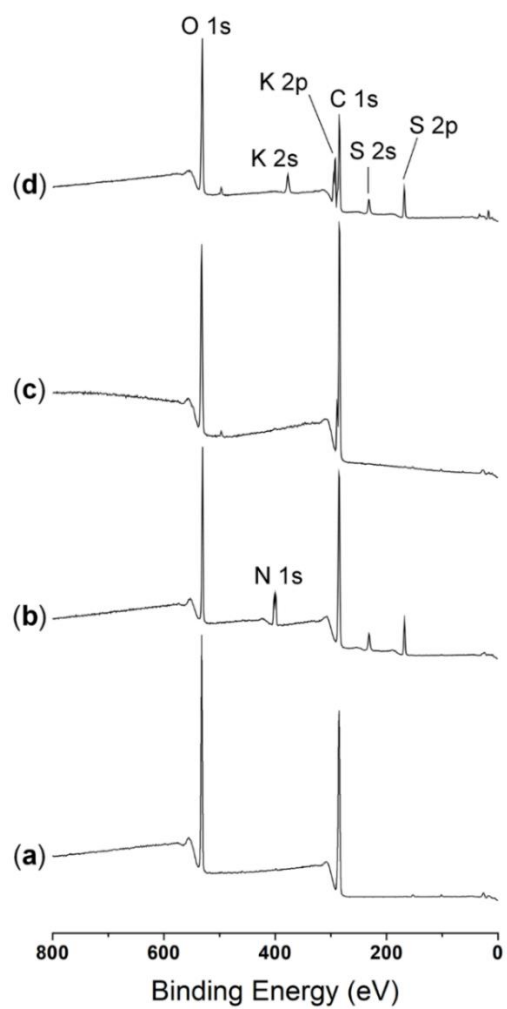

**Figure S2.** Survey XPS spectra of (a) PPEGMEMMA, (b) PMPDSAHA, (c) PMAA, and (d) PSPMA-grafted Ti/TiO<sub>2</sub> substrates.

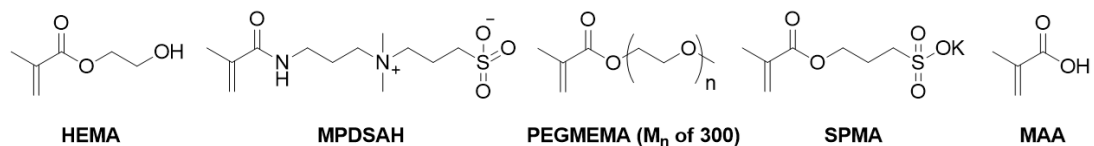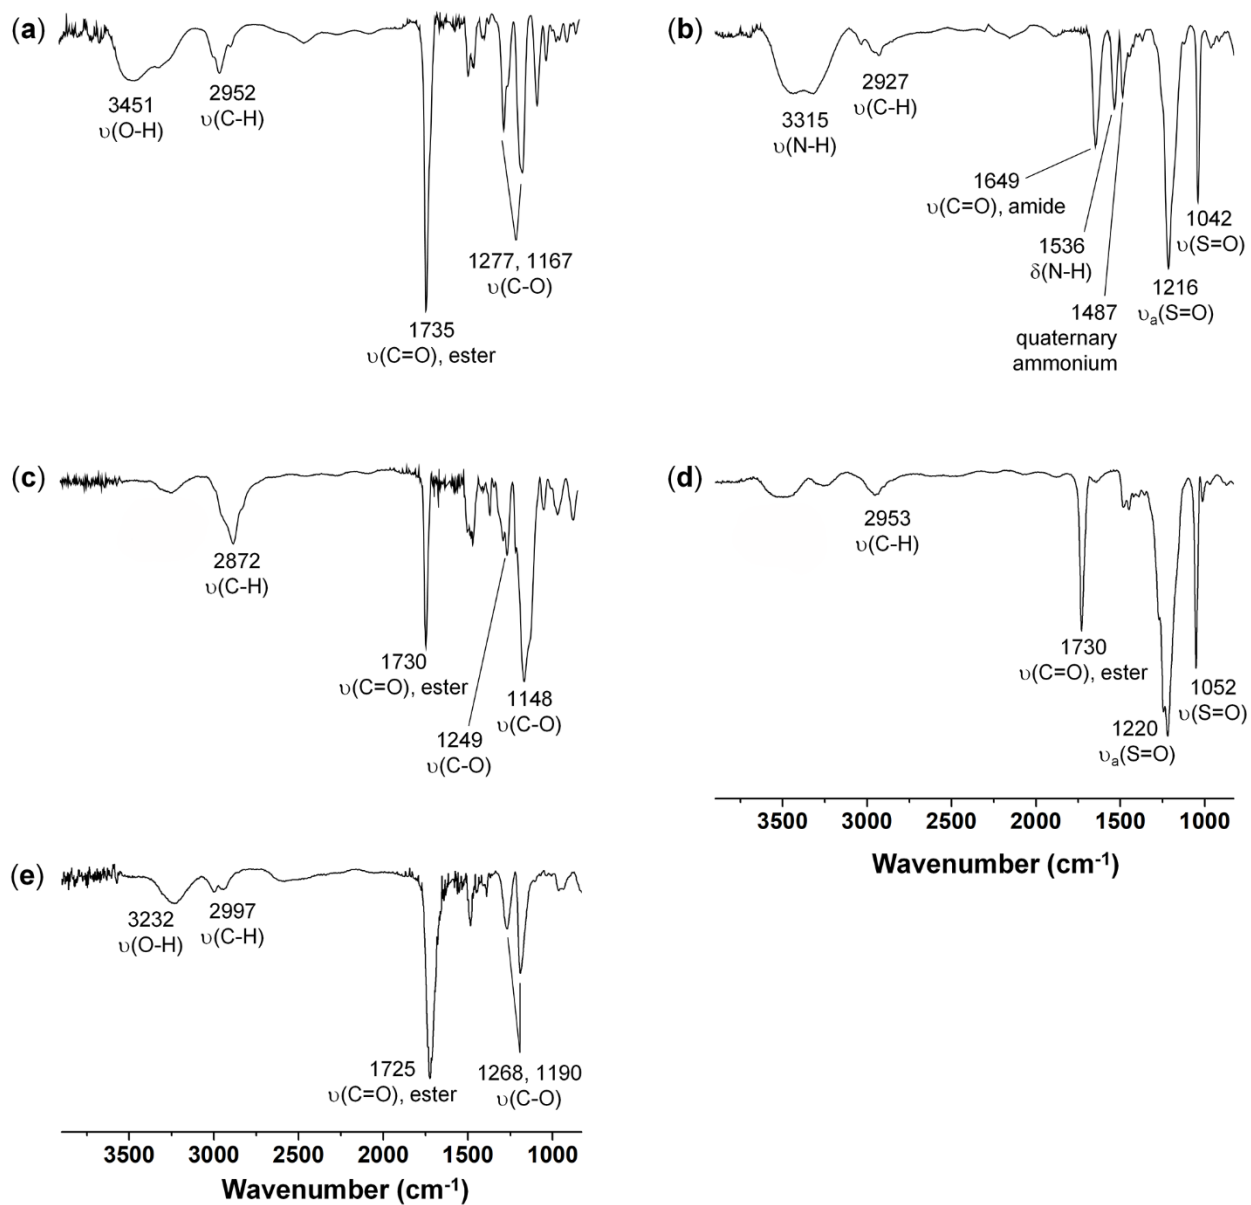

**Figure S3.** FTIR spectra of (a) PHEMA, (b) PMPDSA, (c) PPEGMEMA, (d) PSPMA, and (e) PMAA-grafted Ti/TiO<sub>2</sub> substrates.

**Chemical Stability Tests.** The chemical stability of the PHEMA brushes was evaluated by immersing the polymer-coated substrates into physiological (10 mM PBS, pH 7.4), alkaline (50 mM NaOH, pH 12.72), and acidic (80 mM HCl, pH 1.19) solutions. At a specific time, the substrates were taken out from the solutions, rinsed with DI water, and dried under a stream of N<sub>2</sub> gas.

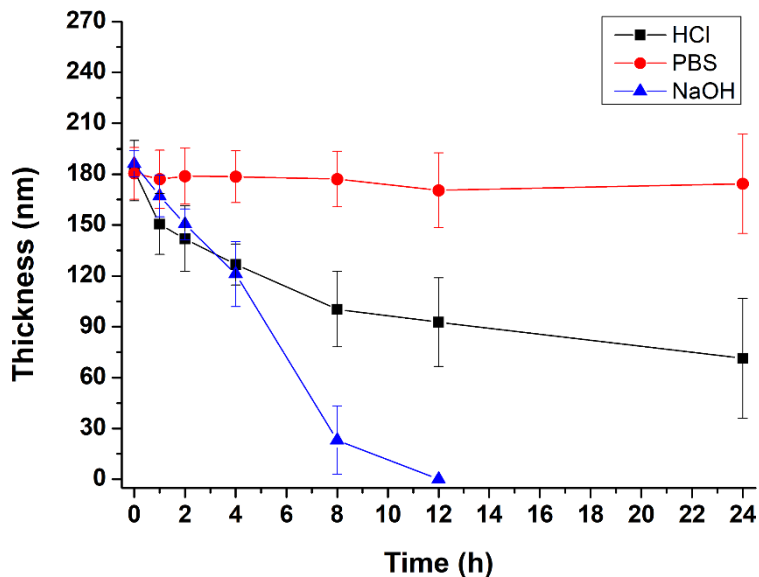

**Figure S4.** Thickness changes of the PHEMA films on Ti/TiO<sub>2</sub> substrates upon exposure to different pH environments over time. 0 h indicates the as-prepared film.

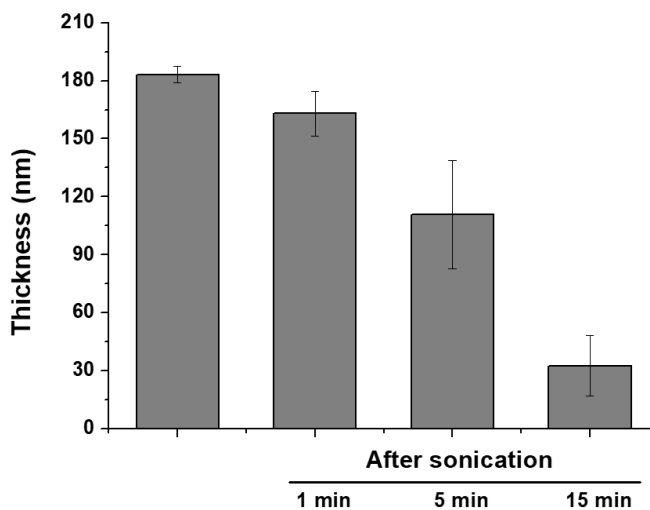

**Figure S5.** Thickness changes of the PHEMA-films on Ti/TiO<sub>2</sub> substrates after sequential sonication treatment.

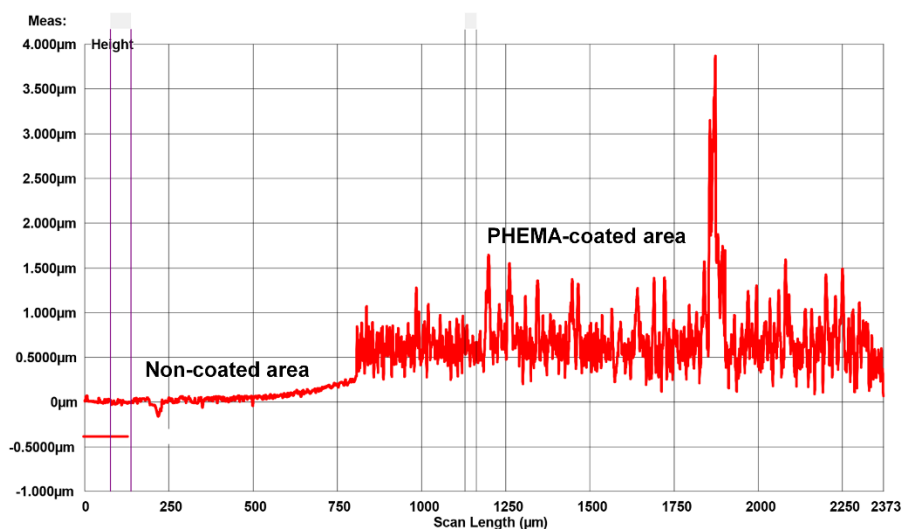

**Figure S6.** Thickness profile of the PHMEA brushes prepared with 1.5 M HEMA on Ti/TiO<sub>2</sub> substrates. It was measured by a contact surface profiler, Alpha-Step.

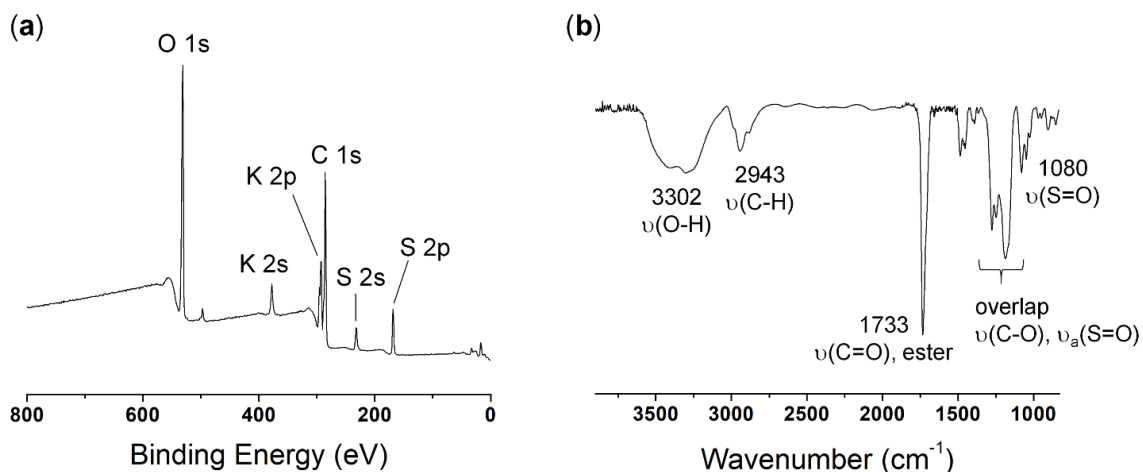

**Figure S7.** (a) XPS and (b) FTIR spectra of PHEMA-*b*-PSPMA-grafted Ti/TiO<sub>2</sub> substrate.

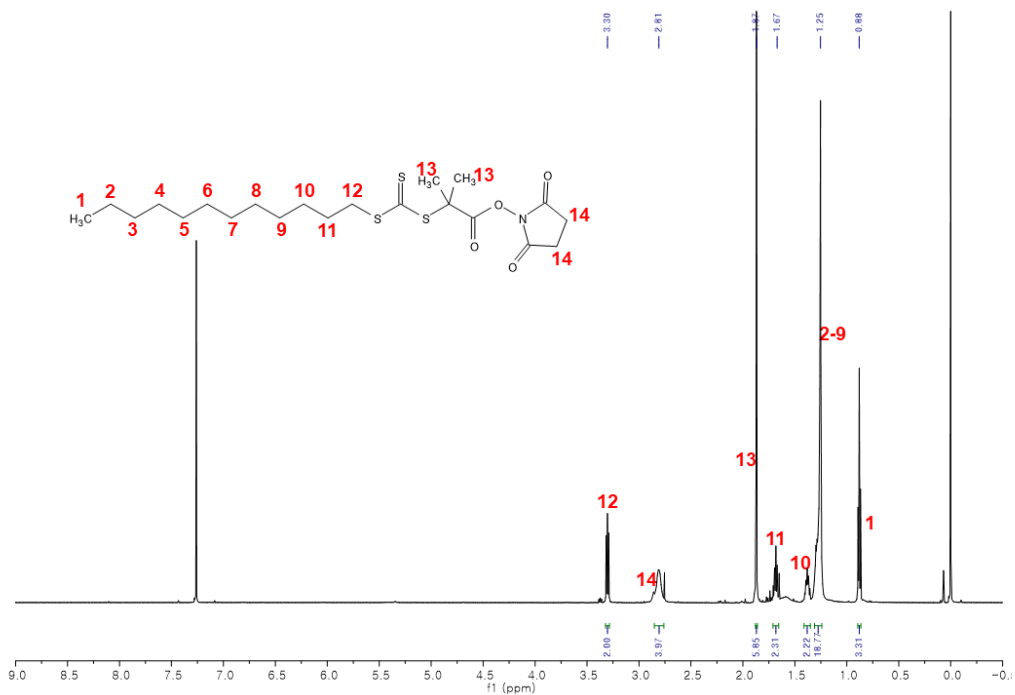

Figure S8. <sup>1</sup>H NMR spectrum of suc-DDMAT in CDCl<sub>3</sub>.<sup>1</sup>

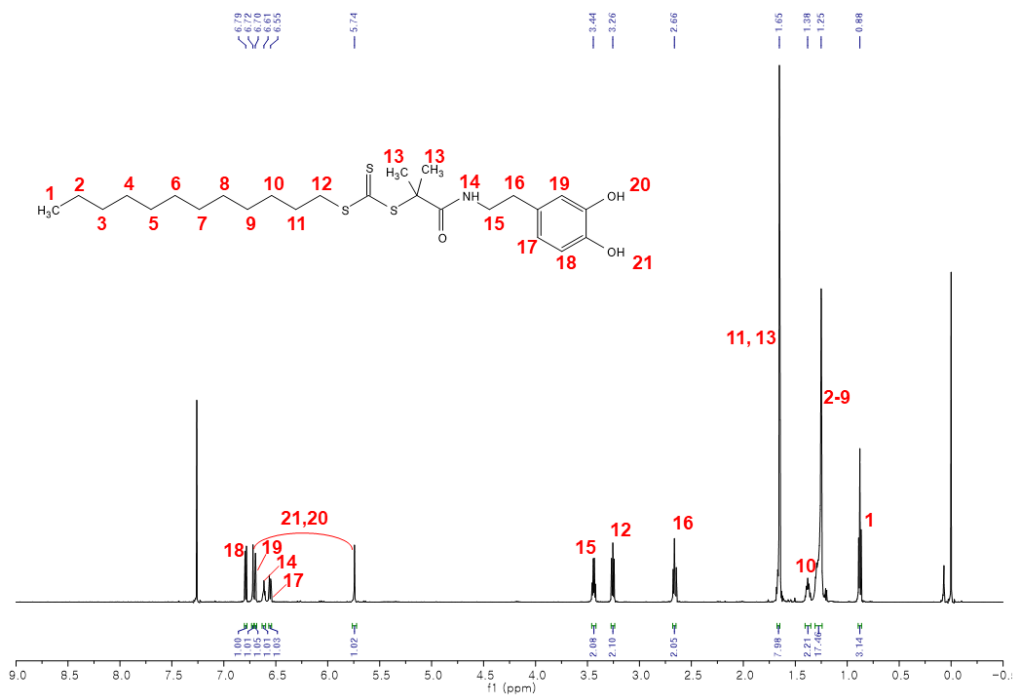

Figure S9. <sup>1</sup>H NMR spectrum of DOPA-DDMAT in CDCl<sub>3</sub>.<sup>1</sup>

**Sample Preparation for GPC Analysis (polymer detachment from a substrate).**<sup>2,3</sup> Titanium substrate coated with PMAA containing a CTA moiety at the chain end was placed in 325-mL dishes, and 0.1 M NaOH solution was added. The dishes were then placed in a fume hood for 100 minutes. The liquid was combined and transferred to a dialysis membrane (12.0-14.0 kDa MWCO), and dialyzed against water for at least 3 days. The water was changed three times per day and freeze-dried. Gel permeation chromatography (GPC) measurements were performed (Waters e2695; Waters Corporation, MA, USA) with deionized (DI) water as the eluent (flow rate 1 mL/min).

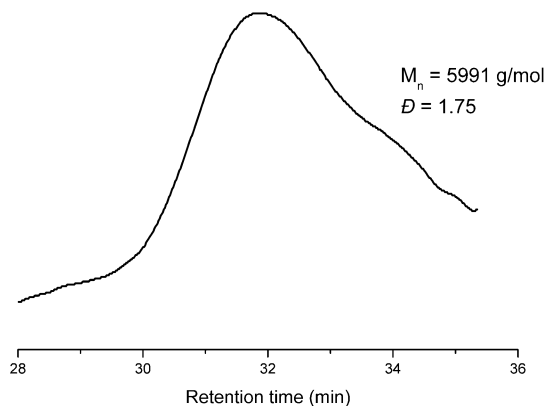

**Figure S10.** GPC chromatogram of PMAA brushes (30.3 nm) grown and detached from a large Ti/TiO<sub>2</sub> substrate<sup>2,3</sup>

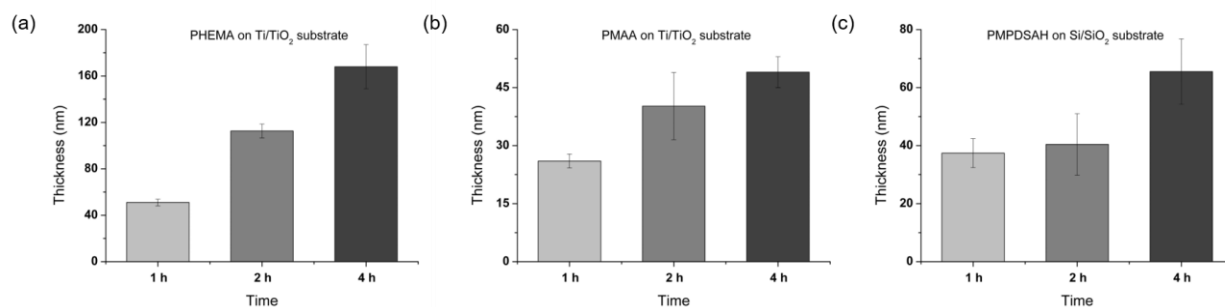

**Figure S11.** Evolution of polymer brush thickness of (a) PHEMA, (b) PMAA, (c) PMPDSAH grown via O<sub>2</sub>-SI-RAFT polymerization

## References

1. D. J. Phillips, G.-L. Davies and M. I. Gibson, *J. Mater. Chem. B*, 2015, **3**, 270-275.
2. W. Yang, C. Liu and Y. Chen, *Langmuir*, 2018, **34**, 3565-3571.
3. H. Wei, J. Ren, B. Han, L. Xu, L. Han and L. Jia, *Colloids Surf B Biointerfaces*, 2013, **110**, 22-28.
